# Supplementary material for: Prephase rituximab/prednisone therapy and aging-related, proinflammatory cytokine milieu in older, vulnerable patients with newly diagnosed diffuse large B-cell lymphoma
Source: PubMed Central journal article supplement — Haematologica. 2021 Jul 22;107(5):1144–52. doi: 10.3324/haematol.2021.278719 (PMC9052931; doi:10.3324/haematol.2021.278719), 2021-07-22

## Prephase rituximab/prednisone therapy and aging-related, proinflammatory cytokine milieu in older, vulnerable patients with newly diagnosed diffuse large B-cell lymphoma

Richard J. Lin,<sup>1,2\*</sup> Colette N. Owens,<sup>1,2\*</sup> Esther Drill,<sup>3</sup> Augustine Iannotta,<sup>1</sup> Mayan Oliveros,<sup>1</sup> Dylan L. Schick,<sup>1</sup> Ariela Noy,<sup>1,2</sup> John F. Gerecitano,<sup>1,2</sup> Pamela R. Drullinsky,<sup>1,2</sup> Philip C. Caron,<sup>1,2</sup> Anita Kumar,<sup>1,2</sup> Matthew J. Matasar,<sup>1,2</sup> Craig Moskowitz,<sup>1,2</sup> Beatriz Korc-Grodzicki,<sup>2,4</sup> Andrew D. Zelenetz,<sup>1,2</sup> Gilles A. Salles,<sup>1,2</sup> and Paul A. Hamlin<sup>1,2</sup>

<sup>1</sup>Department of Medicine, Division of Hematologic Malignancies, Memorial Sloan Kettering Cancer Center; <sup>2</sup>Department of Medicine, Weill Cornell Medical College; <sup>3</sup>Epidemiology and Biostatistics, Memorial Sloan Kettering Cancer Center and <sup>4</sup>Department of Medicine, Geriatrics Service, Memorial Sloan Kettering Cancer Center, New York, NY, USA

*\*RJL and CNO contributed equally as co-first authors.*

©2022 Ferrata Storti Foundation. This is an open-access paper. doi:10.3324/haematol.2021.278719

Received: March 6, 2021.

Accepted: July 12, 2021.

Pre-published: July 22, 2021.

Correspondence: PAUL A. HAMLIN - hamlinp@mskcc.org

---

Supplemental Table 1. Toxicity events by stage

| Characteristic                             | N  | Stage I/II, N = 13 | Stage III/IV, N = 20 | p-value      | q-value |
|--------------------------------------------|----|--------------------|----------------------|--------------|---------|
| Toxic events                               | 33 | 8 (62%)            | 14 (70%)             | 0.7          | >0.9    |
| Severe toxic events                        | 33 | 4 (31%)            | 8 (40%)              | 0.7          | >0.9    |
| G3+ nonheme toxicity / G4+ heme toxicity   | 33 |                    |                      | >0.9         | >0.9    |
| At least 1 G3+ nonheme / G4+ heme toxicity |    | 6 (46%)            | 10 (50%)             |              |         |
| No G3+ nonheme / G4+ heme toxicities       |    | 7 (54%)            | 10 (50%)             |              |         |
| G3+ nonheme toxicities                     | 33 |                    |                      | >0.9         | >0.9    |
| At least 1 G3+ nonheme toxicity            |    | 6 (46%)            | 10 (50%)             |              |         |
| No G3+ nonheme toxicities                  |    | 7 (54%)            | 10 (50%)             |              |         |
| G3+ heme toxicities                        | 33 |                    |                      | <b>0.026</b> | 0.2     |
| At least 1 G3+ heme toxicity               |    | 6 (46%)            | 17 (85%)             |              |         |
| No G3+ heme toxicities                     |    | 7 (54%)            | 3 (15%)              |              |         |
| G4+ heme toxicities                        | 33 |                    |                      | >0.9         | >0.9    |
| At least 1 G4+ heme toxicity               |    | 2 (15%)            | 4 (20%)              |              |         |
| No G4+ heme toxicities                     |    | 11 (85%)           | 16 (80%)             |              |         |

**Abbreviations:** G3, grade 3; G4, grade 4. Bold/Italic indicates significant p-value.

Supplemental Table 2. Correlations of baseline GA measures with baseline pro-inflammatory cytokine levels

| GA measures     | Cytokine levels | Spearman's Rho | p-value  | q-value      |
|-----------------|-----------------|----------------|----------|--------------|
| TUG             | TNF-alpha       | 0.65           | 5.92e-05 | <b>0.005</b> |
| IADL            | TNF-alpha       | -0.48          | 8.49e-04 | <b>0.024</b> |
| CARG score      | IL-6            | 0.50           | 9.27e-04 | <b>0.024</b> |
| % risk          | TNF-alpha       | 0.43           | 1.44e-03 | <b>0.024</b> |
| pKPS            | IL-10           | -0.48          | 1.68e-03 | <b>0.024</b> |
| TUG             | IL-2            | 0.54           | 1.78e-03 | <b>0.024</b> |
| CARG score      | TNF-alpha       | 0.45           | 1.90e-03 | <b>0.024</b> |
| ADL             | IL-10           | -0.42          | 2.40e-03 | <b>0.027</b> |
| pKPS            | TNF-alpha       | -0.46          | 2.68e-03 | <b>0.027</b> |
| pKPS            | IL-2            | -0.58          | 3.36e-03 | <b>0.029</b> |
| cKPS            | IL-6            | -0.45          | 3.91e-03 | <b>0.029</b> |
| LDH (log level) | IL-10           | 0.40           | 4.27e-03 | <b>0.029</b> |
| IADL            | IL-10           | -0.38          | 4.45e-03 | <b>0.029</b> |
| LDH (log level) | TNF-alpha       | 0.42           | 4.58e-03 | <b>0.029</b> |
| IADL            | IL-2            | -0.54          | 5.60e-03 | <b>0.033</b> |
| cKPS            | IL-2            | -0.55          | 6.32e-03 | <b>0.033</b> |

## Original Article

|                     |           |       |          |              |
|---------------------|-----------|-------|----------|--------------|
| ADL                 | TNF-alpha | -0.36 | 6.56e-03 | <b>0.033</b> |
| % risk              | IL-6      | 0.41  | 6.73e-03 | <b>0.033</b> |
| Activity limitation | IL-6      | -0.60 | 6.90e-03 | <b>0.033</b> |
| IADL                | IL-6      | -0.42 | 7.68e-03 | <b>0.034</b> |
| cKPS                | TNF-alpha | -0.33 | 8.00e-03 | <b>0.034</b> |
| LDH (log level)     | IL-2      | 0.48  | 9.30e-03 | <b>0.038</b> |
| TUG                 | IL-10     | 0.41  | 1.05e-02 | <b>0.041</b> |
| CARG score          | IL-10     | 0.41  | 1.32e-02 | <b>0.049</b> |

**Abbreviations:** GA, geriatric assessment; LDH, lactate dehydrogenase; cKPS, clinician-rated karnofsky performance scale; pKPS, patient-rated karnofsky performance scale; ADL, activities of daily living; IADL, instrumental activities of daily living; TUG, timed-get-up and go; CARG, cancer and aging group; IFN, interferon; IL, interleukin; TNF, tumor necrosis factor. Bold indicates significant q-value.

Supplemental Table 3. Baseline and change in GA measures by stage

| GA measures                     | N  | Stage I/II, N = 13<br>(median, IQR) | Stage III/IV, N = 20<br>(median, IQR) | p-value      | q-value |
|---------------------------------|----|-------------------------------------|---------------------------------------|--------------|---------|
| Baseline LOG LDH                | 33 | 5.48 (5.26, 5.58)                   | 5.77 (5.54, 6.02)                     | <b>0.010</b> | 0.089   |
| Baseline cKPS                   | 33 | 90 (70, 90)                         | 70 (60, 90)                           | 0.11         | 0.2     |
| Baseline pKPS                   | 33 | 90 (80, 100)                        | 80 (60, 90)                           | <b>0.037</b> | 0.13    |
| Baseline ADL                    | 33 | 85 (45, 100)                        | 42 (18, 80)                           | <b>0.021</b> | 0.094   |
| Baseline IADL                   | 33 | 14.00 (13.00, 14.00)                | 12.00 (7.75, 14.00)                   | 0.068        | 0.2     |
| Baseline Activity limitation    | 33 | 56 (50, 62)                         | 44 (41, 62)                           | 0.6          | 0.6     |
| Baseline TUG                    | 31 | 9 (9, 11)                           | 14 (11, 20)                           | <b>0.009</b> | 0.089   |
| Baseline CARG score             | 33 | 9.00 (7.00, 11.00)                  | 10.50 (10.00, 13.25)                  | <b>0.045</b> | 0.14    |
| Baseline % risk                 | 33 | 54 (54, 77)                         | 54 (54, 89)                           | 0.3          | 0.4     |
| $\Delta$ in LOG LDH             | 30 | 0.00 (-0.20, 0.24)                  | 0.01 (-0.25, 0.10)                    | 0.3          | 0.4     |
| $\Delta$ in cKPS                | 32 | 0 (0, 0)                            | 10 (0, 15)                            | 0.3          | 0.4     |
| $\Delta$ in pKPS                | 32 | 0 (0, 10)                           | 0 (-10, 10)                           | 0.3          | 0.4     |
| $\Delta$ in ADL                 | 30 | 2 (-5, 6)                           | 0 (-12, 10)                           | 0.6          | 0.6     |
| $\Delta$ in IADL                | 31 | 0.00 (-0.25, 0.00)                  | 0.00 (-0.50, 0.50)                    | 0.6          | 0.6     |
| $\Delta$ in Activity limitation | 31 | 0 (-12, 6)                          | 0 (-17, 0)                            | 0.2          | 0.3     |

## Original Article

|                        |    |                   |                     |              |       |
|------------------------|----|-------------------|---------------------|--------------|-------|
| $\Delta$ in TUG        | 29 | -1.0 (-1.2, 1.0)  | -0.7 (-3.8, 1.0)    | 0.6          | 0.6   |
| $\Delta$ in CARG score | 32 | 0.00 (0.00, 2.00) | -1.00 (-3.00, 0.00) | <b>0.016</b> | 0.094 |
| $\Delta$ in % risk     | 32 | 0 (0, 0)          | 0 (-8, 0)           | 0.2          | 0.3   |

**Abbreviations:** IQR, interquartile range; LDH, lactate dehydrogenase; cKPS, clinician-rated karnofsky performance scale; pKPS, patient-rated karnofsky performance scale; ADL, activities of daily living; IADL, instrumental activities of daily living; TUG, timed-get-up and go; CARG, cancer and aging group. Bold/Italic indicates significant p-value.

Supplemental Table 4. Baseline and change in cytokine levels by stage

| Cytokine levels           | N  | Stage I/II, N = 13<br>(median, IQR) | Stage III/IV, N = 20<br>(median, IQR) | p-value      | q-value |
|---------------------------|----|-------------------------------------|---------------------------------------|--------------|---------|
| Baseline LOG IFN-gamma    | 32 | 1.81 (1.35, 2.31)                   | 2.93 (2.14, 3.82)                     | <b>0.010</b> | 0.2     |
| Baseline LOG IL-10        | 32 | -0.29 (-0.81, 1.41)                 | 0.09 (-0.32, 2.65)                    | 0.12         | 0.5     |
| Baseline LOG IL-12        | 32 | -1.81 (-2.39, -1.32)                | -1.86 (-2.50, -1.36)                  | 0.8          | 0.8     |
| Baseline LOG IL-13        | 32 | -1.11 (-4.41, -0.88)                | -0.81 (-1.65, -0.37)                  | 0.2          | 0.5     |
| Baseline LOG IL-1-beta    | 32 | -5.30 (-5.30, -5.30)                | -5.30 (-5.30, -5.30)                  | 0.6          | 0.7     |
| Baseline LOG IL-2         | 31 | -5.30 (-5.30, -1.95)                | -2.43 (-4.51, -1.03)                  | 0.057        | 0.4     |
| Baseline LOG IL-4         | 32 | -3.35 (-3.58, -3.04)                | -3.15 (-4.17, -2.59)                  | 0.8          | 0.8     |
| Baseline LOG IL-6         | 32 | 0.73 (-0.32, 1.18)                  | 1.07 (0.59, 1.81)                     | 0.2          | 0.5     |
| Baseline LOG IL-8         | 30 | 2.44 (2.20, 2.94)                   | 2.81 (2.50, 3.05)                     | 0.5          | 0.7     |
| Baseline LOG TNF-alpha    | 32 | 0.87 (0.56, 1.69)                   | 1.77 (1.53, 2.29)                     | <b>0.020</b> | 0.2     |
| $\Delta$ in LOG IFN-gamma | 30 | 0.51 (-0.55, 1.30)                  | -0.88 (-1.72, 0.50)                   | 0.2          | 0.5     |
| $\Delta$ in LOG IL-10     | 30 | -0.33 (-1.00, 0.10)                 | -0.72 (-2.19, 0.20)                   | 0.6          | 0.7     |
| $\Delta$ in LOG IL-12     | 30 | -0.12 (-0.47, 0.11)                 | -0.03 (-0.30, 0.36)                   | 0.4          | 0.7     |
| $\Delta$ in LOG IL-13     | 30 | 0.62 (-1.09, 2.74)                  | -0.06 (-1.12, 0.49)                   | 0.5          | 0.7     |
| $\Delta$ in LOG IL-1-beta | 30 | 0.03 (0.00, 2.74)                   | 0.00 (0.00, 0.00)                     | 0.11         | 0.5     |

## Original Article

|                           |    |                     |                      |     |     |
|---------------------------|----|---------------------|----------------------|-----|-----|
| $\Delta$ in LOG IL-2      | 29 | 0.67 (-0.08, 1.92)  | 0.00 (-0.82, 1.28)   | 0.2 | 0.5 |
| $\Delta$ in LOG IL-4      | 30 | -0.19 (-0.52, 0.19) | -0.34 (-0.99, 0.10)  | 0.9 | 0.9 |
| $\Delta$ in LOG IL-6      | 30 | -0.22 (-1.29, 0.29) | -1.02 (-1.77, -0.35) | 0.2 | 0.5 |
| $\Delta$ in LOG IL-8      | 28 | 0.27 (-1.75, 1.69)  | -0.38 (-0.75, 0.24)  | 0.5 | 0.7 |
| $\Delta$ in LOG TNF-alpha | 30 | -1.18 (-1.55, 0.02) | -0.35 (-1.01, -0.03) | 0.6 | 0.7 |

**Abbreviations:** IQR, interquartile range; IFN, interferon; IL, interleukin; TNF, tumor necrosis factor. Bold/Italic indicates significant p-value.



Supplemental Table 5. Association of baseline and change in cytokine levels with toxicity events

| Characteristic (IQR)   | N  | At least 1 toxic event, N = 22 | No toxic events, N = 11 | p-value      | q-value |
|------------------------|----|--------------------------------|-------------------------|--------------|---------|
| Baseline LOG IFN-GAMMA | 32 | 2.42 (1.81, 3.39)              | 2.28 (1.43, 2.99)       | 0.3          | 0.7     |
| Baseline LOG IL10      | 32 | 1.50 (-0.38, 2.29)             | -0.29 (-0.87, 0.00)     | <b>0.012</b> | 0.12    |
| Baseline LOG IL12      | 32 | -1.58 (-2.35, -1.33)           | -2.28 (-2.51, -1.74)    | 0.059        | 0.3     |
| Baseline LOG IL13      | 32 | -0.72 (-1.11, -0.34)           | -3.47 (-5.30, -0.95)    | <b>0.006</b> | 0.12    |
| Baseline LOG IL1-BETA  | 32 | -5.30 (-5.30, -5.30)           | -5.30 (-5.30, -5.30)    | 0.4          | 0.8     |
| Baseline LOG IL2       | 31 | -2.64 (-5.30, -1.52)           | -4.07 (-5.30, -2.25)    | 0.2          | 0.7     |
| Baseline LOG IL4       | 32 | -3.32 (-3.54, -2.41)           | -3.54 (-4.40, -3.08)    | 0.068        | 0.3     |
| Baseline LOG IL6       | 32 | 1.17 (0.37, 1.81)              | 0.66 (-0.31, 1.02)      | 0.09         | 0.3     |
| Baseline LOG IL8       | 30 | 2.80 (2.29, 2.95)              | 2.75 (2.44, 3.25)       | 0.6          | 0.8     |
| Baseline LOG TNF-ALPHA | 32 | 1.80 (0.87, 2.31)              | 1.45 (0.82, 1.65)       | 0.067        | 0.3     |
| Δ in LOG IFN-GAMMA     | 30 | -15 (-75, 77)                  | 4 (-35, 32)             | 0.6          | 0.8     |
| Δ in LOG IL10          | 30 | -51 (-96, -1)                  | -39 (-792, 38)          | 0.9          | 0.9     |
| Δ in LOG IL12          | 30 | 1 (-37, 17)                    | -10 (-15, 9)            | 0.5          | 0.8     |
| Δ in LOG IL13          | 30 | -24 (-214, 78)                 | 0 (-235, 53)            | 0.7          | 0.8     |
| Δ in LOG IL1-BETA      | 30 | 0 (0, 37)                      | 0 (0, 1)                | 0.5          | 0.8     |
| Δ in LOG IL2           | 29 | 20 (-32, 40)                   | 0 (-9, 35)              | 0.3          | 0.7     |
| Δ in LOG IL4           | 30 | -9 (-27, -0)                   | -7 (-32, 9)             | 0.7          | 0.8     |
| Δ in LOG IL6           | 30 | -46 (-118, -12)                | -55 (-173, 23)          | 0.6          | 0.8     |
| Δ in LOG IL8           | 28 | -13 (-30, 24)                  | -4 (-32, 47)            | 0.5          | 0.8     |
| Δ in LOG TNF-ALPHA     | 30 | -40 (-95, 18)                  | -34 (-56, -17)          | 0.8          | 0.8     |

**Abbreviations:** IQR, interquartile range; IFN, interferon; IL, interleukin; TNF, tumor necrosis factor.

## Original Article

### Figure Legend.

**Supplemental Figure 1:** Changes in individual pro-inflammatory cytokine levels (log-transformed) pre- and post-prephase therapy with q-value indicated. **Abbreviations:** IL, interleukin; TNF, tumor necrosis factor.

Supplemental Figure 1. Changes in cytokine levels from pre- to post-prephase therapy

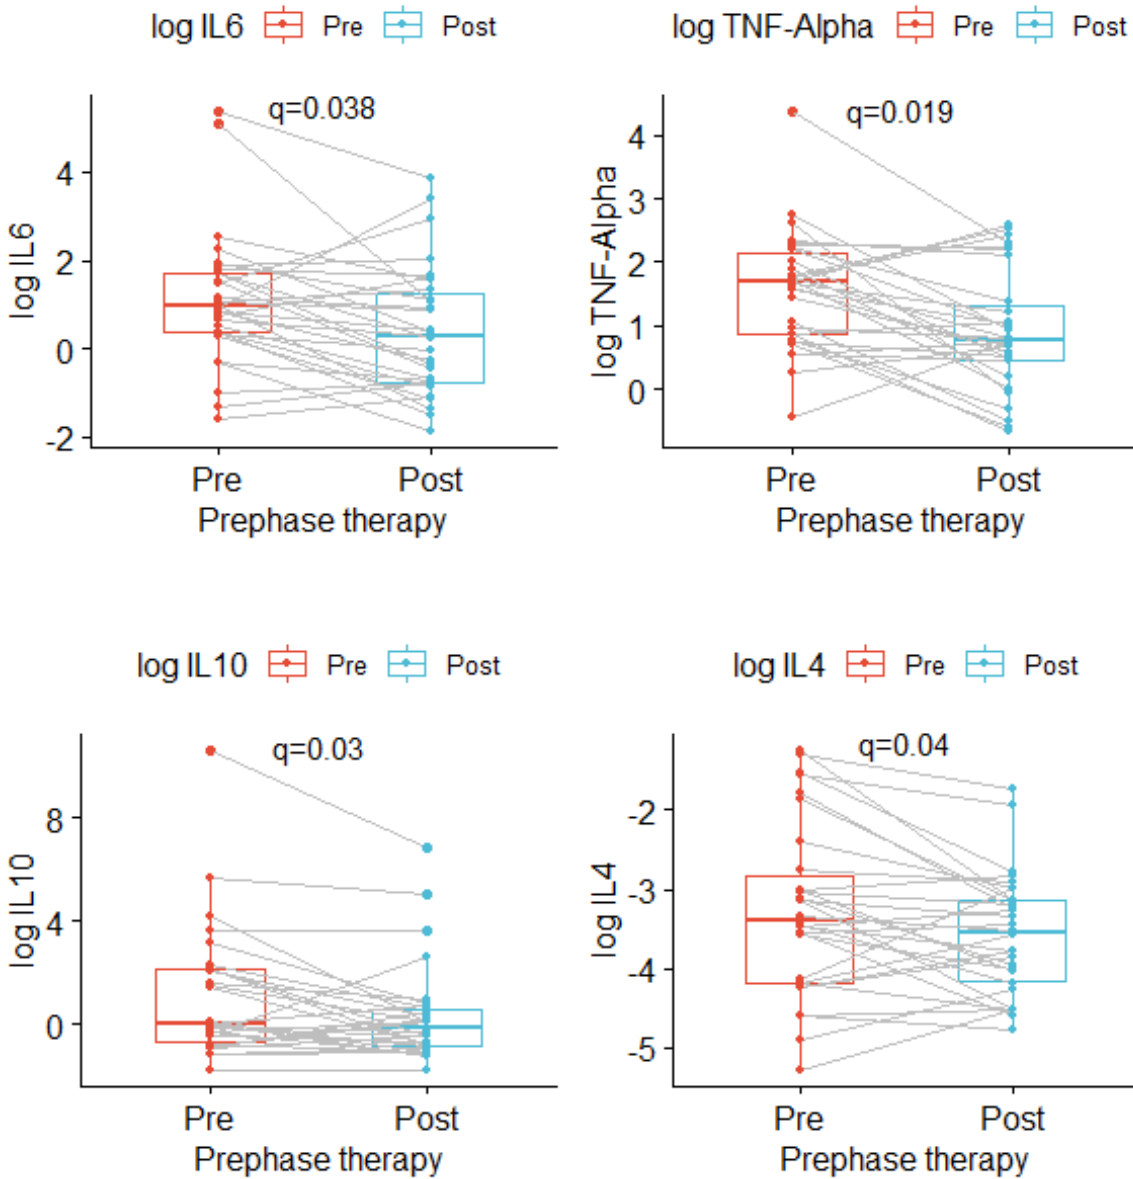

Supplement: 2021_278719_LIN_SUPPL.pdf [file 2021_278719_LIN_SUPPL.pdf]
